# Supplementary material
Source: publisher figshare collection journal article supplement (https://tandf.figshare.com/articles/dataset/_/9879728)

16°06' E 16°09' E 16°12' E 16°15' E 16°18' E 16°21' E 16°24' E

45°56' N

45°52' N

45°50' N

45°48' N

45°46' N

45°44' N

45°42' N

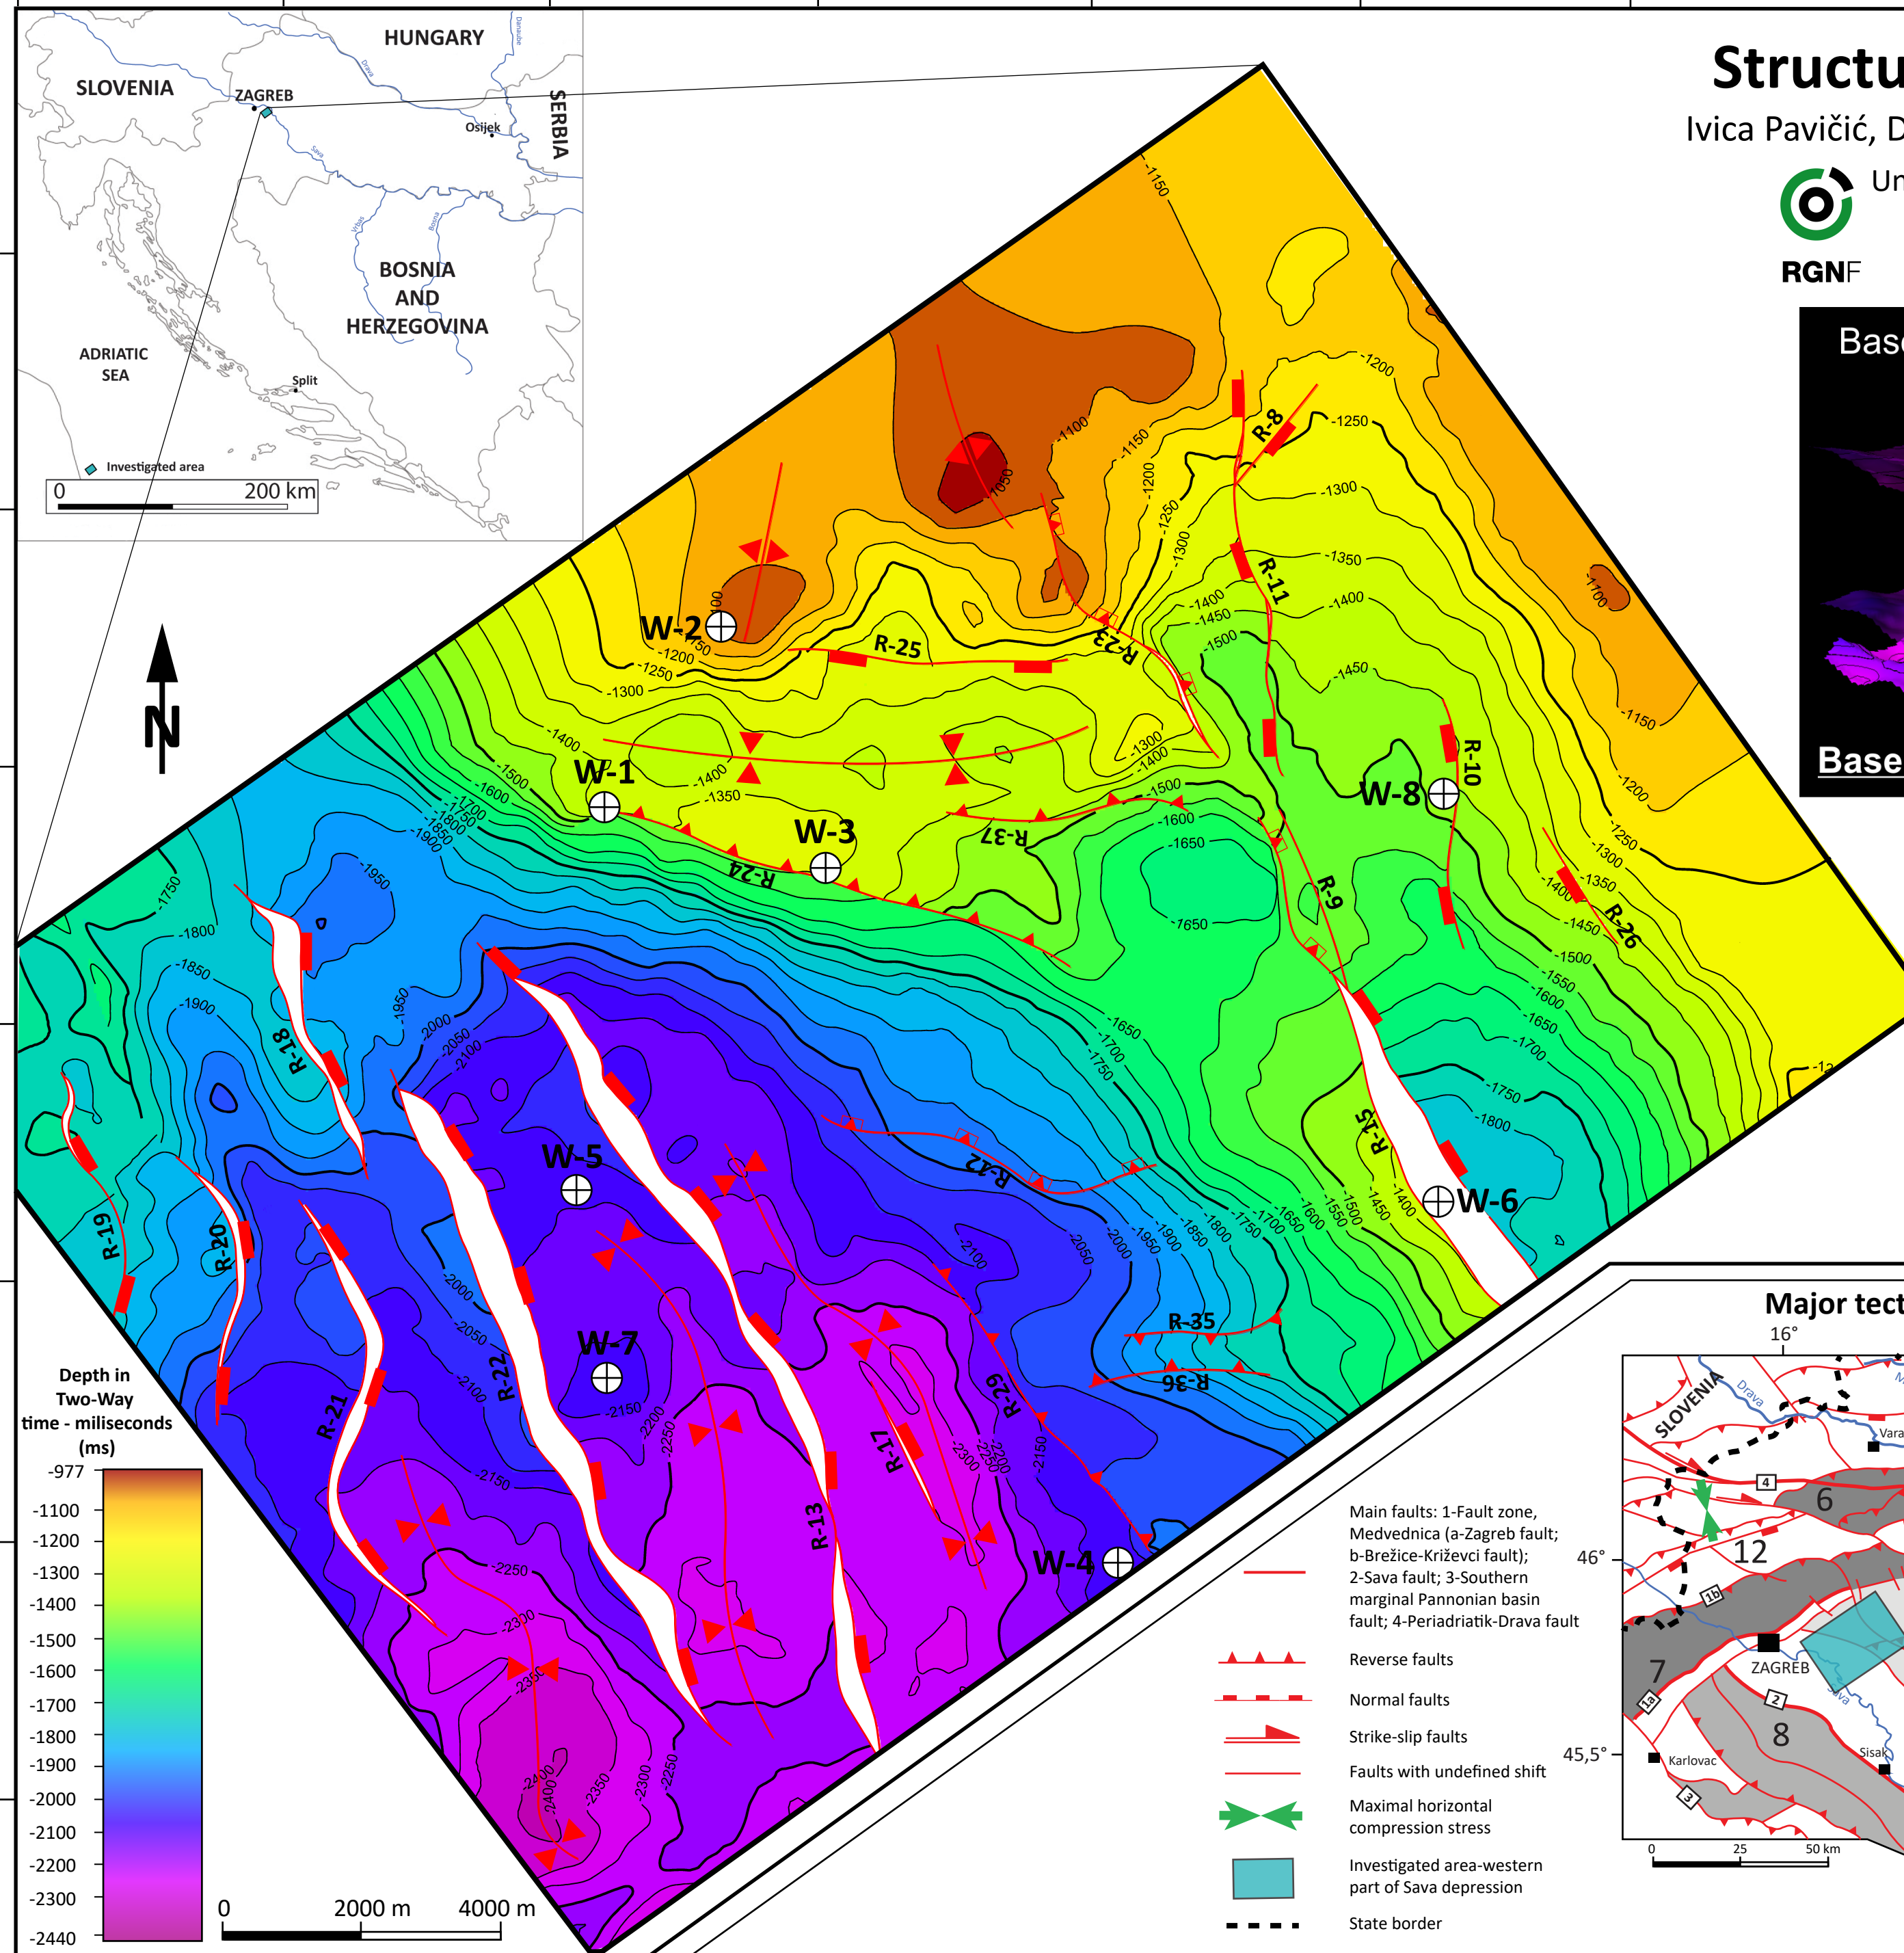

## Structural map of Base of Neogene

Ivica Pavičić, David Rukavina, Bojan Matoš & Bruno Tomljenović

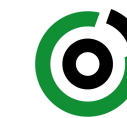

RGNF

University of Zagreb, Faculty of Mining, Geology and  
Petroleum Engineering, Pierottijeva 6,  
10 000 Zagreb, Croatia

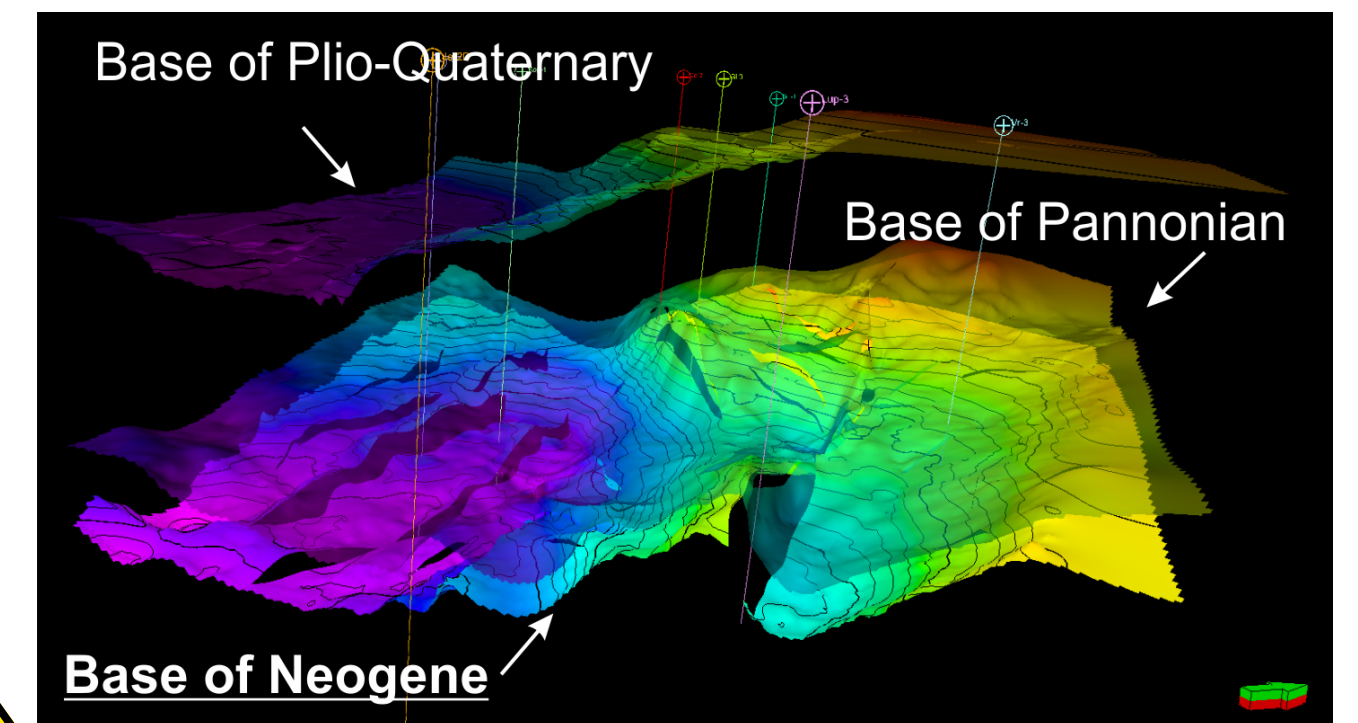

### Legend:

Well

⊕ W-1

Normal fault

R-10

Fault surface  
(fault throw)

R-12

Reversely  
reactivated  
fault

R-24

Reverse fault

Anticline

Syncline

Isochore -  
depth in  
Two-Way  
time (ms)

-1150

### Major tectonic units in the NW Croatia (after Prelogović et al., 1998)

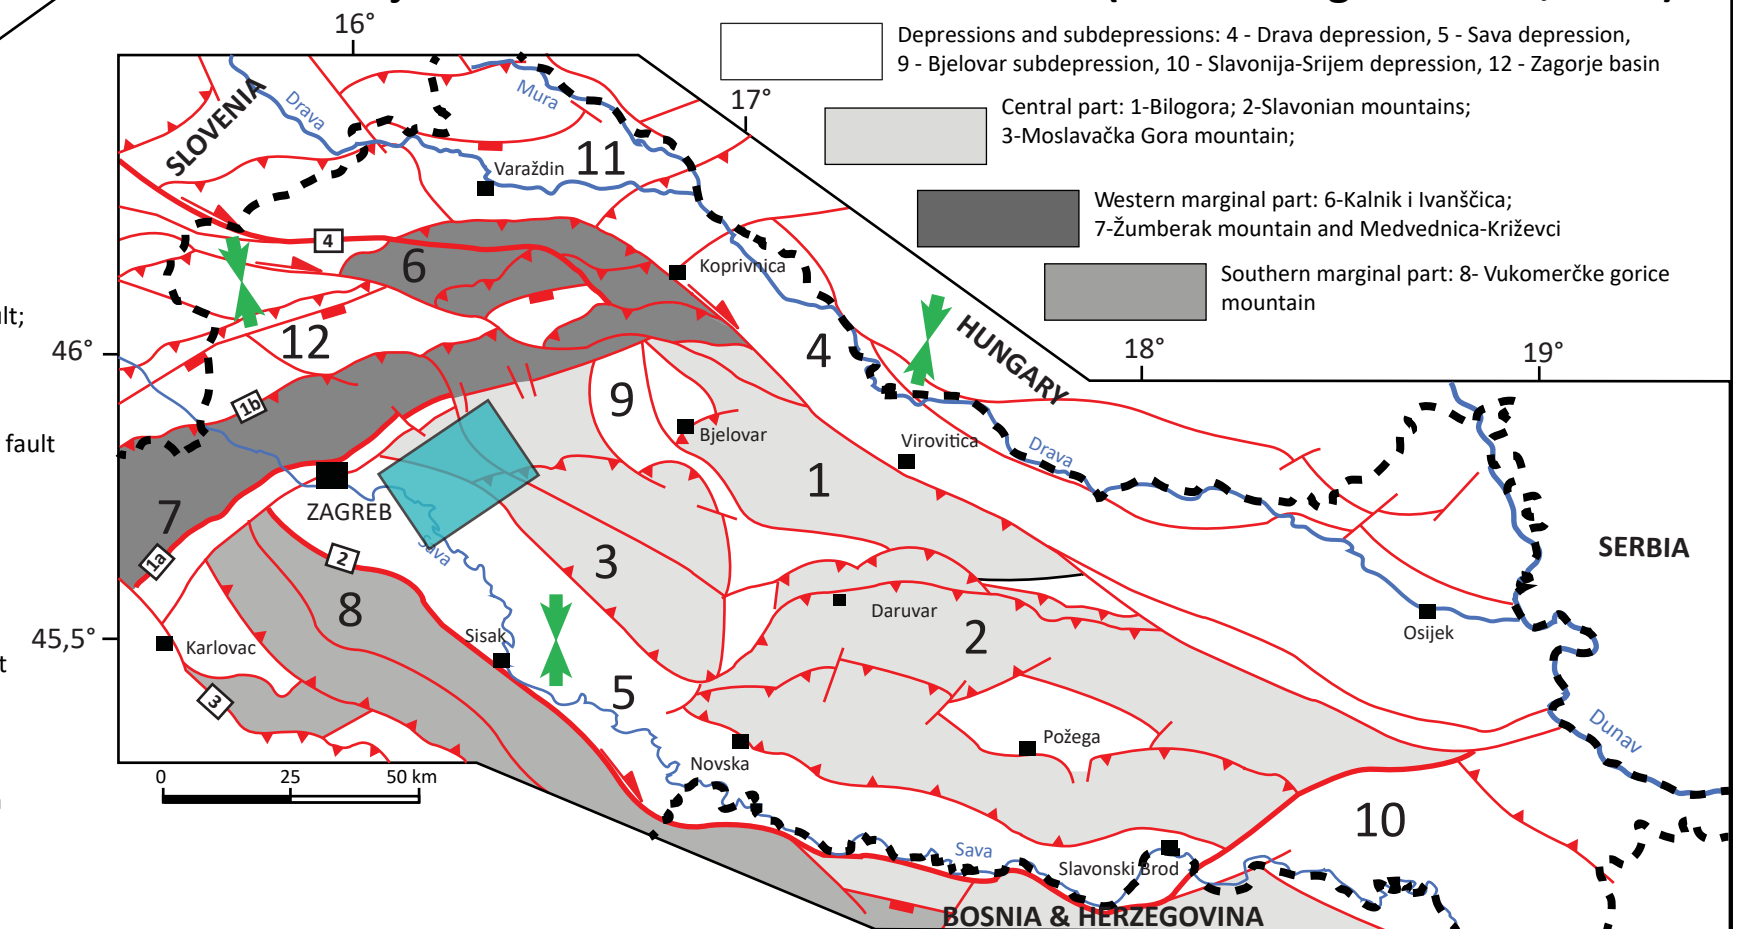

Supplement: Supplementary file 1 [file 1]
