# Supplementary material
Source: publisher figshare collection journal article supplement (https://tandf.figshare.com/articles/dataset/_/9879728)

# Structural map of Base of Plio-Quaternary

Ivica Pavičić, David Rukavina, Bojan Matoš & Bruno Tomljenović

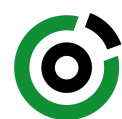

University of Zagreb, Faculty of Mining, Geology and  
Petroleum Engineering, Pierottijeva 6,  
10 000 Zagreb, Croatia

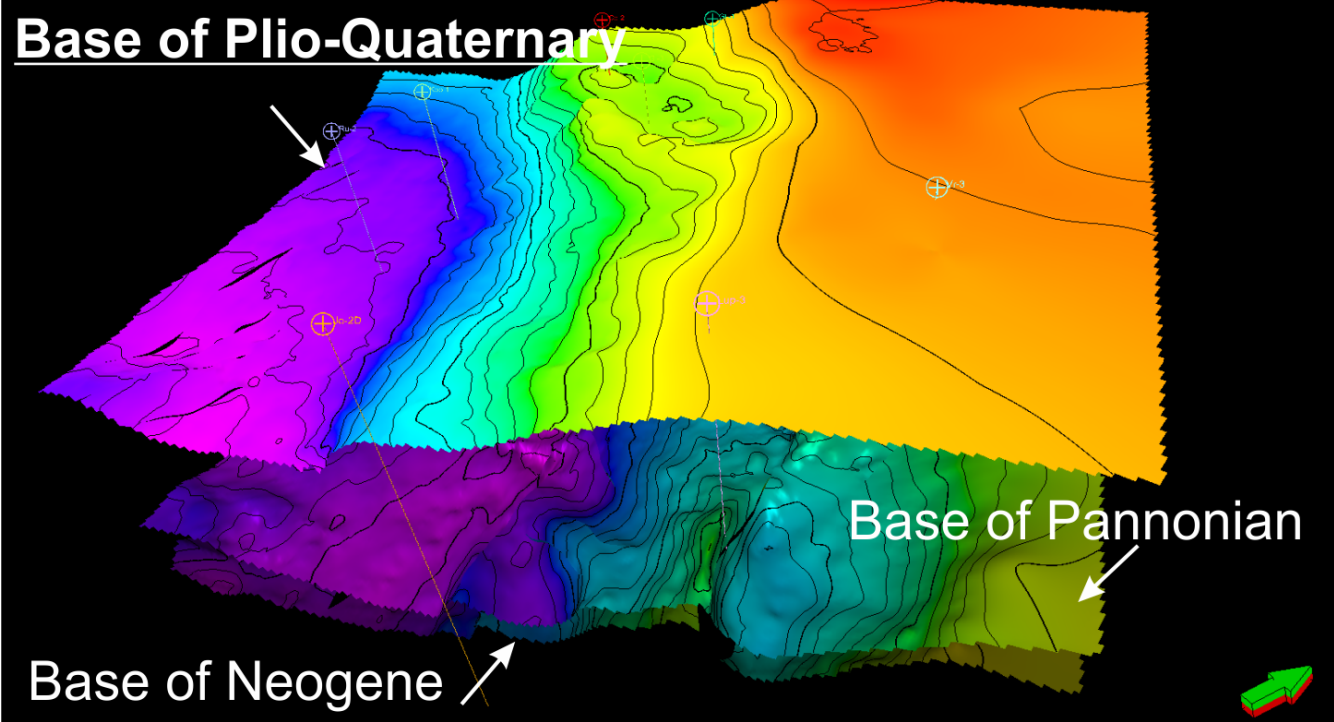

## Legend:

- |               |        |                                       |           |
|---------------|--------|---------------------------------------|-----------|
| Well          | ⊕ W-1  | Syncline                              | ↕         |
| Normal fault  | — R-10 | Isochore - depth in Two-Way time (ms) | — -1150 — |
| Reverse fault | ↕ R-24 |                                       |           |
| Anticline     | ↕      |                                       |           |

## Major tectonic units in the NW Croatia (after Prelogović et al., 1998)

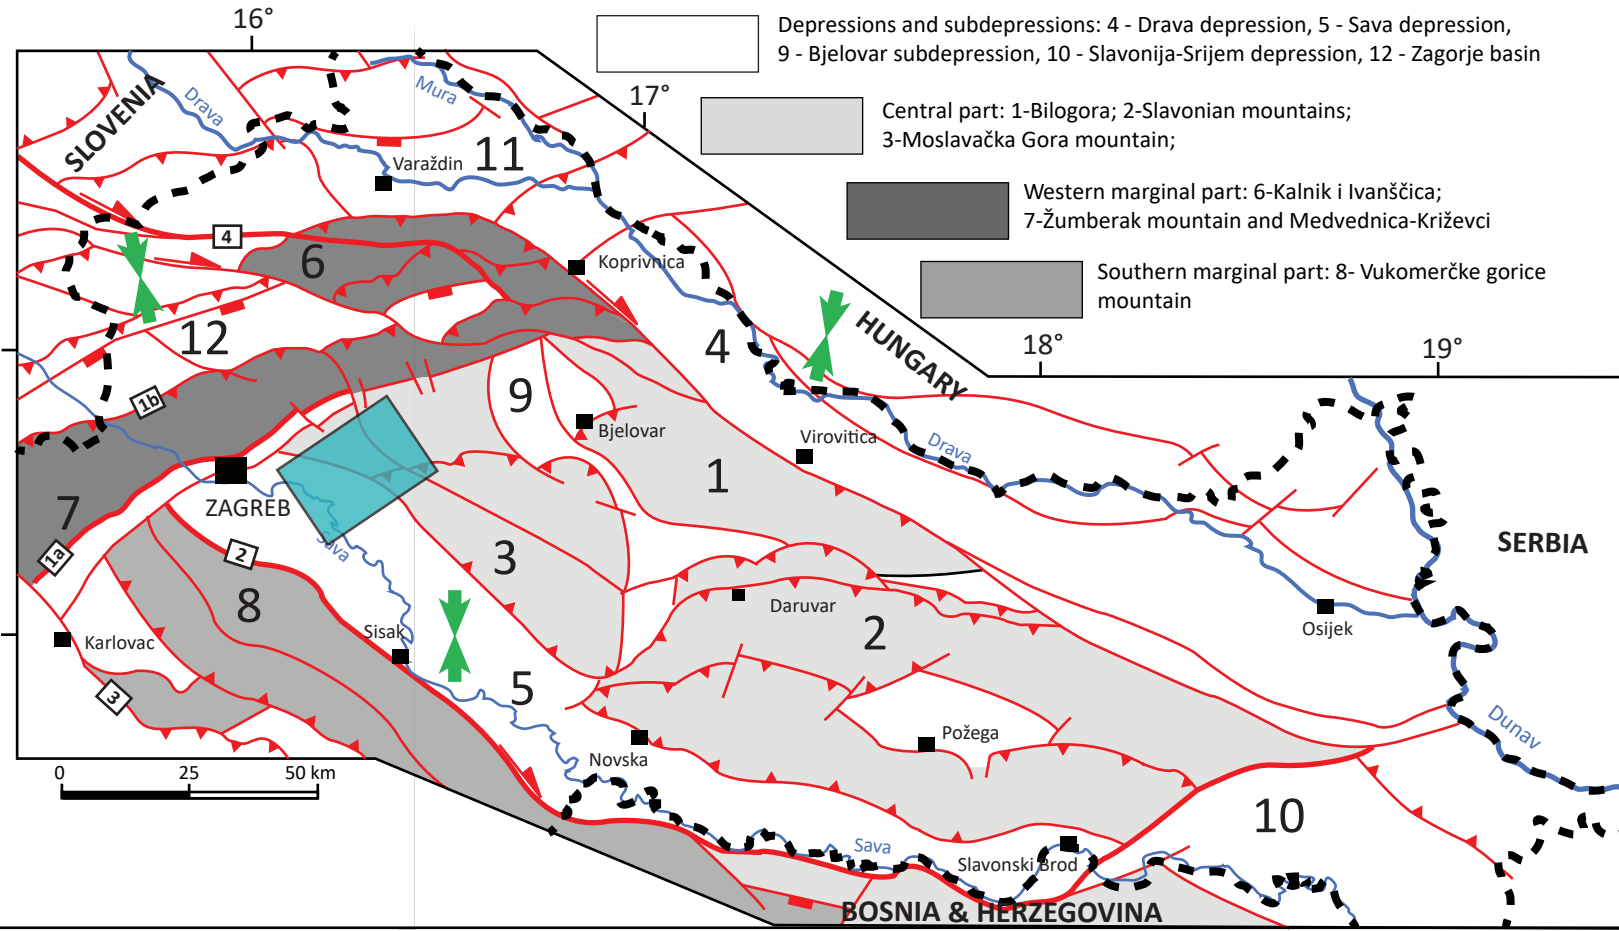

Supplement: Supplementary file 2 [file 1]
